1 **Molecular evidence for sweeping discontinuity between peracarid (Crustacea) fauna of**  
2 **Macaronesian islands and nearby continental coasts: over fifty candidate endemic species**

3  
4 Pedro E Vieira<sup>1,2\*</sup>, Andrea Desiderato<sup>3,4,5</sup>, Sofia L Azevedo<sup>1</sup>, Patricia Esquete<sup>1</sup>, Filipe O Costa<sup>2,6</sup>, Henrique  
5 Queiroga<sup>1</sup>

6  
7 <sup>1</sup>Centre for Environmental and Marine Studies (CESAM), Department of Biology, University of Aveiro,  
8 Campus Universitário de Santiago, 3810-193 Aveiro, Portugal

9 <sup>2</sup>Centre of Molecular and Environmental Biology (CBMA), Department of Biology, University of Minho,  
10 Campus de Gualtar, 4710-057 Braga, Portugal

11 <sup>3</sup>Department of Invertebrate Zoology and Hydrobiology, University of Lodz, Banacha 12/16, 90-237  
12 Lodz, Poland

13 <sup>4</sup>Programa de Pós-graduação em Zoologia (PGZOO), Universidade Federal do Paraná, CP 19020,  
14 Curitiba, Paraná 81531-980, Brazil

15 <sup>5</sup>Alfred Wegener Institute, Helmholtz Centre for Polar and Marine Research, Department of Functional  
16 Ecology, Am Handelshafen 12, 27570 Bremerhaven, Germany

17 <sup>6</sup>Institute of Science and Innovation for Bio-Sustainability (IB-S), University of Minho, Portugal

18

19 **Corresponding author:**

20 Pedro E Vieira

21 [pedroefrvieira@gmail.com](mailto:pedroefrvieira@gmail.com)

22 <https://orcid.org/0000-0003-4880-3323>

23 **Abstract**

24 Oceanic islands are recognized evolutionary hotspots for terrestrial organisms, but little is known  
25 about their impact on marine organisms' evolution and biogeography. The volcanic archipelagos of  
26 Macaronesia occupy a vast and complex region which is particularly suitable to investigate marine  
27 island biogeography.

28 In this study, we used mitochondrial DNA sequences to investigate the genetic differentiation between  
29 the populations from Webbnesia (i.e. Madeira, Selvagens and Canaries) and adjacent coasts, of 23  
30 intertidal peracarid species. All species had unexpectedly high intraspecific genetic distances, reaching  
31 more than 20% in some cases. Between 79 and 95 Molecular Operational Taxonomic Units (MOTUs)  
32 were found in these species. Webbnesia populations displayed an impressive genetic diversity and  
33 high endemism, with 83% of the MOTUs being private to these islands, particularly La Palma and  
34 Madeira. Network analyses suggested higher similarity between Webbnesia and Azores than with  
35 adjacent continental coasts.

36 These results reveal an unanticipated and sweeping biogeographic discontinuity of peracaridean fauna  
37 between Webbnesia and the Iberian Peninsula, raising suspicion about the possible occurrence of  
38 identical patterns in other groups of marine invertebrates in the region. We emphasize the unique  
39 genetic heritage hosted by these islands, underlining the need to consider the fine scale endemism in  
40 marine conservation efforts.

41

42

43 **Keywords**

44 Biogeographic discontinuity, Islands, Peracarida, cryptic species, DNA barcoding, Northeast Atlantic.

45

## 46 **Introduction**

47       The marine realm is generally considered to have lower habitat diversity and higher connectivity  
48 than terrestrial habitats [1,2]. Non-marine biota inhabiting oceanic islands have to cross the ocean to  
49 disperse and are more prone to isolation than marine organisms [3]. However, several studies have  
50 been indicating an increasing number of discontinuities between and within marine bioregions,  
51 possibly driven by constraints in dispersal and gene flow, that only recently started to be noticed and  
52 reported (e.g. [4,5]). Moreover, it is known that even geographically close islands [6–8] may comprise  
53 distinct marine coastal communities in response to local biotic and abiotic factors.

54       Recent studies on the marine biota of Macaronesia, sustain that this group of 31 islands  
55 belonging to five archipelagos (i.e. Azores, Madeira, Selvagens, Canaries, Cape Verde) in the Northeast  
56 Atlantic (NEA), comprise in fact not one, but three distinct bioregions. For example, Cabo Verde differs  
57 significantly from the other Macaronesian archipelagos and appears to be a subprovince within the  
58 West African Transition province [9–11], while the remaining archipelagos may belong to the  
59 Lusitanian province [11,12]. Because Madeira, Selvagens and Canaries share a higher affinity in their  
60 biota, it was proposed that these archipelagos should be grouped in a separate ecoregion named  
61 “Webbnesia”, leaving the Azores as an independent ecoregion by itself [11].

62       Recently, with the support of molecular tools, we have found cryptic diversity within the isopod  
63 *Dynamene edwardsi* (Lucas, 1849) [13] and in the amphipod family Hyalidae [14] occurring in  
64 Macaronesia. Our studies suggested segregation among islands and a possible discontinuity between  
65 Webbnesian fauna and the adjacent continental landmasses.

66       Peracarids are abundant benthic crustaceans in marine coasts that have presumably lower  
67 dispersal capacities due to lacking planktonic larvae, thereby being particularly suited to investigate  
68 biogeographic discontinuities in the open ocean. In this study, we aimed to use the cytochrome c  
69 oxidase subunit I (COI) DNA barcoding region [15] to conduct a comprehensive parallel screening of  
70 genetic differentiation across populations from the NEA of 23 morphospecies of Amphipoda, Isopoda  
71 and Tanaidacea. In particular, we aim to probe the occurrence of cryptic diversity by investigating the  
72 suspected genetic and taxonomic discontinuities between the above-mentioned presumptive  
73 bioregions.

74

## 75 **Material and Methods**

76       Peracarid specimens were collected in the archipelagos of Azores, Madeira, Selvagens and  
77 Canaries and in the continental coasts of Morocco and Iberian Peninsula (figure 1). Morphology-based  
78 taxonomic identification was performed consulting specialized literature. Sampling details and  
79 literature used can be accessed in the supplementary material.

80 According to the main hypothesis, specimens of each species were chosen from two main  
81 regions (Iberian Peninsula and Webbnesia), following the genetic differentiation observed between  
82 these regions in previous works [13,14]. The first group included the specimens sampled in Iberian  
83 Peninsula (IP) and the second included the specimens collected in Webbnesia, i.e. Madeira, Selvagens  
84 and Canaries archipelagos (MACA). Only the sequences of *Stenothoe monoculoides* (Montagu, 1813)  
85 were from the North Sea, because there were no public data available from the Iberian Peninsula.  
86 However, our unpublished data derived from metabarcoding already detected this species in  
87 Northwest of Spain and was confirmed as the same haplotype as the one from North Sea. Therefore,  
88 we are confident that this morphospecies occurs in Iberian Peninsula. In addition, when present,  
89 specimens from Morocco (MORO) and Azores (AZ), were added to the main experimental design  
90 (figure 1; supplementary material, Table S1).

91 DNA extraction, COI amplification, PCR products purification and sequencing were performed  
92 for each specimen following [14]. The other sequences were obtained in our previous works  
93 [13,14,16,17] and from [18] (see supplementary material, Tables S1-S2, for list of primers, number of  
94 specimens in each species and source). A common fragment of 520 base pair was obtained and used  
95 in subsequent analyses. Maximum and mean pairwise distances (p-distances) for COI within each  
96 morphospecies were calculated in general and within groups in MEGA 7.0 [19].

97 To assess the presence of cryptic species (i.e. multiple molecular operational taxonomic units -  
98 MOTUs) in each morphospecies [20], five methods were applied to the dataset: automatic barcode  
99 gap analysis (ABGD), BOLD (BINs), bayesian Poisson Tree Partition (bPTP), Generalized Mixed Yule  
100 Coalescent (GMYC) and TCS (details can be consulted in the supplementary material). A majority rule  
101 (i.e. most common number of MOTUs for each species) was applied and, in case of a tie, a conservative  
102 approach was applied choosing the lowest number of MOTUs.

103 Chord diagrams were built in R 3.5.0 [21] with the package 'chorddiag' [22] to inspect the  
104 number of MOTUs endemic to each island (including Iberia and Morocco) and region (i.e. MACA, IP,  
105 AZ, MORO), and amount of shared ones. Community detection representations (based on shared and  
106 private MOTUs between/within locations) were calculated with the R packages 'igraph' [23] and  
107 'visNetwork' [24].

108

## 109 **Results**

### 110 Molecular analyses and MOTUs delimitation

111 A total of 483 sequences were analysed, of which 173 were produced in this study, belonging to  
112 23 morphospecies. Mean intraspecific distance (ISD) varied between 1.81% (*Ampithoe ramondi*  
113 Audouin, 1826) and 17.16% (*Janira maculosa* Leach, 1814), while Maximum ISD was higher than 3%

114 for all species (Table 1). Mean p-distances between IP and MACA regions were always higher than 3%,  
115 with the highest value observed in the isopod *Anthura gracilis* (Montagu, 1808) (28%, Table 1).

116 The molecular species delimitation methods retrieved between 79 (ABGD) and 95 (TCS) MOTUs  
117 (Table 2). Between 41 and 53 MOTUs were present among the 13 amphipods, between 25 and 29  
118 MOTUs in the seven isopods and between 11 and 14 MOTUs in the three tanaidaceans (Table 2,  
119 supplementary material Figs. S1-3). The consensus number of MOTUs was 89 (Table 2), with a  
120 minimum of two in six morphospecies and maximum of 11 in *Apothyale stebbingi* Chevreux, 1888 (Table  
121 2, supplementary material, Fig. S4).

### 122 Peracarid community analysis

123 The MACA region harboured more MOTUs than the IP region (56 and 26 respectively; figure 1,  
124 supplementary material, Fig. S4), with the islands of La Palma (19), Madeira (17) and Gran Canaria (14)  
125 with the highest number of MOTUs. No more than four MOTUs were shared between islands and only  
126 three were shared between MACA and IP (figure 1). La Palma and Madeira were the islands with the  
127 highest number of private MOTUs (12 and 8 respectively), with MACA displaying 49 endemic MOTUs  
128 and IP only 18 (figure 1; supplementary material, Fig. S4).

129 The artificial networks of the islands including Morocco and Iberian Peninsula, retrieved  
130 Multilevel (modularity:0.080; figure 2A), Spinglass (modularity:0.110; figure 2B), Edge betweenness  
131 (modularity:0.020; figure 2C) and Walktrap (modularity:0.023; figure 2D) as the most fitting  
132 community detection algorithms to our data. All these algorithms grouped Canaries and Azores  
133 together, with Madeira and Selvagens showing different patterns (depending on the algorithm), and  
134 Morocco and IP in separate clusters. When regions were used, the network retrieved Multilevel and  
135 Spinglass (modularity: 0.061; figure 2E) algorithms. Both retrieved the same topology (figure 2E), with  
136 pairs MORO-IP and AZ-MACA clustering together.

137

### 138 **Discussion**

139 Compared to terrestrial fauna, very little is known about the biogeography and evolution of  
140 insular marine fauna [25]. The common perception for Macaronesia's marine invertebrate fauna is  
141 that many species are shared with mainland coasts of NW Africa and Iberia, hence a basal faunistic  
142 continuity is assumed. The absence of any obvious geographic barriers for marine organisms' dispersal  
143 in the region intuitively reinforces this perception. Our findings appear to contradict this view, at least  
144 in what concerns peracarids. We have found: i) extensive and profound genetic differentiation  
145 between peracarid populations from Iberia and Webbnesia; ii) extensive peracarid endemic diversity  
146 in Webbnesia, patent in 48 well-supported and highly divergent MOTUs; and iii) geographic  
147 segregation among Webbnesia's MOTUs, including many private to only one or a few islands. Our study  
148 captured for the first time this faunistic discontinuity because, to this date, it is probably the most

149 extensive marine invertebrate metasppecies screening of genetic differentiation between Atlantic  
150 continental and islands populations.

151 *Diversification and evolution of peracarids and other marine invertebrates in Macaronesia*

152 The 23 species here examined displayed completely sorted MOTUs between Iberia and  
153 Webbnesia, which were well supported by multiple clustering methods. The large amount of COI data  
154 available for animals indicates that COI-based MOTUs commonly correspond to separate species  
155 [26,27]. The genetic distances within morphospecies we observed are above the intraspecific range  
156 reported in comprehensive studies with crustaceans [17,18,28]. Even considering the top range of COI  
157 evolutionary rates estimated for crustaceans [29], these distances indicate long-term evolutionary  
158 divergence and suggest that these may be separate species.

159 Phylogeographic discontinuities have been reported in marine environments worldwide, e.g.  
160 [5,30–34], as the notorious case of the Wallace’s line in the Makassar Strait [4], but little is known for  
161 the NEA. Differentiation between populations of Webbnesia and those from Iberian Peninsula was also  
162 found in taxa with a planktonic phase such as sponges [35], molluscs [36,37] and fish [38], suggesting  
163 a phylogeographic discontinuity for marine fauna in general, despite the potential for larval transport  
164 by recurring oceanographic features. Long-distance dispersal in peracarideans is mainly due to  
165 stochastic events through rafting on floating objects or mediated by human vectors [39,40].  
166 Notwithstanding the different lifestyles of each peracaridean species, a deep genetic differentiation  
167 was transversal between the populations from Webbnesia and adjacent continental coasts, suggesting  
168 that other factors such as "post-colonization monopolization" or the islands characteristics (e.g. [41–  
169 44]) may play a major role in the geographic segregation of these species. Moreover, considering the  
170 deep genetic divergences found, it is probable that the populations’ differentiation preceed the last  
171 glaciation maximum [45] and occurred thousands to millions of years ago [13].

172 While a clear differentiation between Webbnesia and Iberian populations was patent in all the  
173 examined species, the populations from Azores and Morocco displayed specificities depending on the  
174 taxon. The biota of Azores and Webbnesia is usually presumed similar [46], due to the currents’  
175 patterns during interglacial periods [11,47]. Previous studies showed genetic similarities between  
176 marine invertebrates of these archipelagos [35,48], while others suggest stronger affinities between  
177 Azorean and Iberian populations [36]. In this study, both patterns were observed, although with higher  
178 support for the Azores-Webbnesia connection than for the Azores-Iberian Peninsula. Moreover, our  
179 data suggests a higher genetic proximity between Moroccan and Iberian populations, contradicting  
180 other studies that relate the populations from Morocco with those from Macaronesia due to their  
181 vicinity [32,46,49,50].

182 During glacial periods, the isolation of Webbnesia’s islands may have been significantly reduced  
183 when compared to present geographic distances [51], due to a lower sea level, greater surface area

184 and exposure of the currently submerged islands that could have served as stepping-stones. This  
185 factor, together with the similarity of habitats and geographic proximity between Madeira, Selvagens  
186 and Canaries, may explain the high number of shared MOTUs within Webbnisia (figure 2).

### 187 Implications for marine biodiversity conservation and management

188 Species are commonly used as framework for conservation strategies since they constitute the  
189 basic units for distributional and habitat studies in biodiversity assessments. However, with the  
190 emergence of molecular methods, the importance of molecular evidence for species delineation [52]  
191 arose as a critical contribution to understand evolution and inform conservation strategies. Using  
192 molecular methods, MOTUs could be considered as the functional units of biodiversity and might act  
193 as proxies for estimating diversity [53]. Concepts such as "Evolutionary Significant Units" (ESU) may  
194 help surpass the limitations imposed by rigid species boundaries [54], enabling the recognition of  
195 pertinent infraspecific units for the purpose of biodiversity conservation [55] and connectivity [56].  
196 Hence, regardless of the formal species boundaries of the peracarids here investigated, it appears  
197 there is at least an extraordinary level of endemism of genetic lineages with very small ranges,  
198 frequently no larger than the island that harbours them.

199 The preservation of genetic diversity is an essential factor in the design of marine conservation  
200 areas which should therefore include domains that incorporate fundamental evolutionary processes  
201 [57]. In the marine environment, priority should be given to the conservation of those species most  
202 vulnerable to human activities and those with populations dangerously affected. Due to their small  
203 size and isolation, island and endemic species are more likely to extinguish than continental or non-  
204 endemic species [58]. Moreover, the human activities that mainly affect the marine environment  
205 usually take place in coastal areas, whose extension is limited and where the highest marine  
206 productivity is reached [57,59].

207 Marine invertebrates are rarely contemplated in marine protected areas, despite benefitting  
208 greatly from these programs [60], and little information is available about the status of each  
209 species/MOTU/ESU/population in Macaronesia. Remarkably, neither Webbnisia or the Azores were  
210 included yet in the "Ecologically or Biologically Significant Marine Areas" (EBSAs;  
211 [www.cbd.int/ebsa/ebsas](http://www.cbd.int/ebsa/ebsas)) [61]. However, both would probably qualify if there was a wider awareness  
212 of their unique endemic marine diversity and vulnerability. Indeed, the extent of the taxonomic and  
213 genetic diversity harboured by the marine invertebrates from Macaronesia is still poorly known [11,62]  
214 and there is an urgent need to accelerate its inventory, particularly using molecular tools, given that  
215 at current rates it will take decades till completion [63]. To protect, manage and conserve the unique  
216 biological heritage of these archipelagos, it is crucial that the fine-scale endemism of marine  
217 organisms is considered in the design of more effective networks of marine protected areas.

218

219 Conclusions

220 This study provides compelling evidence for a sweeping discontinuity in shallow-water peracarid  
221 fauna between Webbesia and nearby continental coasts. We also found rampant endemic peracarid  
222 diversification in these archipelagos, and multiple cases of clear geographic sorting of MOTUs even  
223 among islands separated by no more than 60 km. These findings challenge the intuitive perception of  
224 faunistic continuity of marine organisms between islands and nearby mainland, somewhat  
225 downplaying the role of contemporary dispersal and connectivity as a main explanation for the  
226 biogeography of insular marine organisms. Indeed, founder effects, mechanisms of monopolization  
227 and preemptive exclusion [13,41,64], coupled with the islands' configuration [44], may have a more  
228 prevalent role in the elucidation of contemporary biogeographies of islands' shallow water  
229 invertebrates than previously acknowledged. We hope these results may rise the awareness on the  
230 need of considering a larger variety of taxa for the identification of protected areas shedding light into  
231 the poorly known island biogeography of marine organisms.

232

233 **Acknowledgements**

234 The authors wish to thank the colleagues who helped during fieldwork, sample processing  
235 and/or laboratory work: Tavares M and Santos R (University of Algarve, Portugal), Ladeiro B, Peteiro L,  
236 Gomes I, Albuquerque R, Guimarães B and Fuente N (University of Aveiro, Portugal) and Gomes N  
237 (University of Minho, Portugal). Additionally, thanks to Carvalho D in name of the Portuguese Museum  
238 of Natural History and Science of Lisbon for supplying material from the  
239 EMEPC/M@rBis/Selvagens2010 and EMAM/PEPC\_M@rBis/2011 campaigns to Selvagens. Thanks to  
240 Bellisario B for feedback regarding network analysis. Finally, thanks to Ferreira EL for the use of some  
241 equipments.

242 This work was supported by the project "DiverseShores - Testing associations between genetic  
243 and community diversity in European rocky shore environments (PTDC/BIA-BIC/114526/2009)"  
244 funded by the Fundação para a Ciência e Tecnologia (FCT) under the COMPETE programme supported  
245 by the European Regional Development Fund. FCT also supported a PhD grant to PEV  
246 (SFRH/BD/86536/2012). Thanks to FCT/MCTES are also due for the financial support to CESAM  
247 (UIDP/50017/2020+UIDB/50017/2020), through national funds. PE was funded through FCT in the  
248 scope of the framework contract foreseen in the numbers 4, 5 and 6 of the article 23 of the Decree-  
249 Law 57/2016, of August 29, changed by Law 57/2017, of July 19.

250

251

252

253



254 **Data Accessibility**

255 All new DNA sequences generated in this work were deposited in BOLD under the projects (PMACA:  
256 “Peracarida Macaronesia vs IberiaPeninsula” and PERAC: “Peracarida New data”). All the data used in  
257 this work is available in the BOLD dataset DS-PMACA: “Peracarida Macaronesia vs IberiaPeninsula”.  
258 All R scripts are available at <https://github.com/pedroemmanuelvieira/Macaronesiadiscontinuity>.

259

260 **Author Contributions**

261 PEV, FOC and HQ designed the research plan; PEV, AD and SLA performed the research and analysed  
262 the data; PEV, PE and AD identified the specimens; PEV wrote the original manuscript; all the authors  
263 contributed with suggestions, to the manuscript structure and reviewed the manuscript final version.

264

265 **Competing interests**

266 The authors declare no conflict of interest.

267

268 **References**

- 269 1. Gray JS. 1997 Marine biodiversity: patterns, threats and conservation needs. *Biodivers. Conserv.* **6**, 153–175.  
270 2. Appeltans W *et al.* 2012 The Magnitude of Global Marine Species Diversity. *Curr. Biol.* **22**, 2189–2202.  
271 3. Cox SC, Carranza S, Brown RP. 2010 Divergence times and colonization of the Canary Islands by Gallotia  
272 lizards. *Mol. Phylogenet. Evol.* **56**, 747–757. (doi: 10.1016/j.ympev.2010.03.020).  
273 4. Barber PH, Palumbi SR, Erdmann MV, Moosa MK. 2000 A marine Wallace’s line? *Nature* **406**, 692–693.  
274 5. Bellisario B, Camisa F, Abbattista C, Cimmaruta R. 2019 A network approach to identify bioregions in the  
275 distribution of Mediterranean amphipods associated with Posidonia oceanica meadows. *PeerJ* **7**, e6786. (doi:  
276 10.7717/peerj.6786).  
277 6. Fernández-Palacios JM *et al.* 2016 Towards a glacial-sensitive model of island biogeography. *Glob. Ecol.*  
278 *Biogeogr.* **25**, 817–830. (doi: 10.1111/geb.12320).  
279 7. Rijdsdijk KF *et al.* 2014 Quantifying surface-area changes of volcanic islands driven by Pleistocene sea-level  
280 cycles: biogeographical implications for the Macaronesian archipelagos. *J. Biogeogr.* **41**, 1242–1254. (doi:  
281 10.1111/jbi.12336).  
282 8. Ávila SP *et al.* 2018 Global change impacts on large-scale biogeographic patterns of marine organisms on  
283 Atlantic oceanic islands. *Mar. Pollut. Bull.* **126**, 101–112. (doi: 10.1016/j.marpolbul.2017.10.087).  
284 9. Spalding MD *et al.* 2007 Marine Ecoregions of the World: A Bioregionalization of Coastal and Shelf Areas.  
285 *BioScience* **57**, 573–583. (doi: 10.1641/B570707).  
286 10. Tuya F, Haroun RJ. 2009 Phylogeography of Lusitanian Macaronesia: biogeographic affinities in species  
287 richness and assemblage composition. *Eur. J. Phycol.* **44**, 405–413. (doi: 10.1080/09670260902836246).  
288 11. Freitas R *et al.* 2019 Restructuring of the ‘Macaronesia’ biogeographic unit: A marine multi-taxon  
289 biogeographical approach. *Sci. Rep.* **9**, 15792. (doi: 10.1038/s41598-019-51786-6).  
290 12. Almada VC *et al.* 2013 Complex origins of the Lusitania biogeographic province and northeastern Atlantic  
291 fishes. *Front. Biogeogr.* **5**, 1. (doi: 10.21425/F5FBG14493).  
292 13. Vieira PE *et al.* 2019 Deep segregation in the open ocean: Macaronesia as an evolutionary hotspot for low  
293 dispersal marine invertebrates. *Mol. Ecol.* **28**, 1784–1800. (doi: 10.1111/mec.15052).  
294 14. Desiderato A *et al.* 2019 Macaronesian islands as promoters of diversification in amphipods: The remarkable  
295 case of the family Hyalidae (Crustacea, Amphipoda). *Zool. Scr.* **48**, 359–375. (doi: 10.1111/zsc.12339).  
296 15. Hebert PDN, Cywinska A, Ball SL, deWaard JR. 2003 Biological identifications through DNA barcodes. *Proc.*  
297 *R. Soc. Lond. B Biol. Sci.* **270**, 313–321. (doi: 10.1098/rspb.2002.2218).  
298 16. Lobo J *et al.* 2013 Enhanced primers for amplification of DNA barcodes from a broad range of marine  
299 metazoans. *BMC Ecol.* **13**, 34. (doi: 10.1186/1472-6785-13-34).  
300 17. Lobo J *et al.* 2016 Contrasting morphological and DNA barcode-suggested species boundaries among shallow-  
301 water amphipod fauna from the southern European Atlantic coast. *Genome* (doi:10.1139/gen-2016-0009).  
302 18. Raupach MJ *et al.* 2015 The Application of DNA Barcodes for the Identification of Marine Crustaceans from  
303 the North Sea and Adjacent Regions. *PLOS ONE* **10**, e0139421. (doi: 10.1371/journal.pone.0139421).  
304 19. Kumar S, Stecher G, Tamura K. 2016 MEGA7: Molecular Evolutionary Genetics Analysis Version 7.0 for  
305 Bigger Datasets. *Mol. Biol. Evol.* **33**, 1870–1874. (doi: 10.1093/molbev/msw054).  
306 20. Fišer C, Robinson CT, Malard F. 2018 Cryptic species as a window into the paradigm shift of the species  
307 concept. *Mol. Ecol.* **27**, 613–635. (doi: 10.1111/mec.14486).  
308 21. R Core Team. 2018 R: A language and environment for statistical computing. R Foundation for Statistical  
309 Computing, Vienna, Austria. <https://www.R-project.org/>.  
310 22. Flor M. 2016 chorddiag: Interactive Chord Diagrams. R package version 0.1.2.  
311 <http://github.com/mattflor/chorddiag/>.  
312 23. Csardi G, Nepusz T. 2006 The igraph software package for complex network research. InterJournal Complex  
313 Systems. <http://igraph.org>.  
314 24. Almende B, Thieurmel B, Robert T. 2018 visNetwork: Network Visualization using ‘vis.js’ Library. R package  
315 version 2.0.4. <https://CRAN.R-project.org/package=visNetwork>.  
316 25. Dawson MN. 2016 Island and island-like marine environments. *Glob. Ecol. Biogeogr.* **25**, 831–846. (doi:  
317 10.1111/geb.12314).  
318 26. Teixeira MAL. *et al.* 2020 Molecular and morphometric analyses identify new lineages within a large *Eumida*  
319 (Annelida) species complex. *Zool. Scr.* **49**, 222–235. (doi: 10.1111/zsc.12397).  
320 27. Blaxter M. 2016 Imagining Sisyphus happy: DNA barcoding and the unnamed majority. *Philos. Trans. R. Soc.*  
321 *B Biol. Sci.* **371**, 20150329. (doi: 10.1098/rstb.2015.0329).  
322 28. Costa F, Henzler C, Lunt D, Whiteley NM, Rock J. 2009 Probing marine *Gammarus* (Amphipoda) taxonomy  
323 with DNA barcodes. *Syst. Biodivers.* **7**, 365–379. (doi: 10.1017/S1472200009990120).  
324 29. Loeza-Quintana T *et al.* 2018 Recalibrating the molecular clock for Arctic marine invertebrates based on DNA  
325 barcodes. *Genome* **62**, 1–17. (doi: 10.1139/gen-2018-0107).

- 326 30. Leese F, Kop A, Wägele JW, Held C. 2008 Cryptic speciation in a benthic isopod from Patagonian and Falkland  
327 Island waters and the impact of glaciations on its population structure. *Front. Zool.* **5**, 19. (doi: 10.1186/1742-  
328 9994-5-19).
- 329 31. Markow TA, Pfeiler E. 2010 Mitochondrial DNA evidence for deep genetic divergences in allopatric  
330 populations of the rocky intertidal isopod *Ligia occidentalis* from the eastern Pacific. *Mol. Phylogenet. Evol.*  
331 **56**, 468–473. (doi: 10.1016/j.ympev.2009.12.002).
- 332 32. Xavier R *et al.* 2011 Phylogeography of the marine isopod *Stenosoma nadejda* (Rezig, 1989) in North African  
333 Atlantic and western Mediterranean coasts reveals complex differentiation patterns and a new species. *Biol. J.*  
334 *Linn. Soc.* **104**, 419–431. (doi: 10.1111/j.1095-8312.2011.01718.x).
- 335 33. Arnaud-Haond S *et al.* 2007 Vicariance patterns in the Mediterranean Sea: east–west cleavage and low  
336 dispersal in the endemic seagrass *Posidonia oceanica*. *J. Biogeogr.* **34**, 963–976. (doi: 10.1111/j.1365-  
337 2699.2006.01671.x).
- 338 34. Varela AI, Haye PA. 2012 The marine brooder *Excirrolana braziliensis* (Crustacea: Isopoda) is also a complex  
339 of cryptic species on the coast of Chile. *Rev. Chil. Hist. Nat.* **85**, 495–502. (doi: 10.4067/S0716-  
340 078X2012000400011).
- 341 35. Sá-Pinto A, Branco M, Sayanda D, Alexandrino P. 2008 Patterns of colonization, evolution and gene flow in  
342 species of the genus *Patella* in the Macaronesian Islands. *Mol. Ecol.* **17**, 519–532. (doi: 10.1111/j.1365-  
343 294X.2007.03563.x).
- 344 36. Xavier JR, Soest RWM, van Breeuwer AJ, Martin, AMF, Menken SBJ. 2010 Phylogeography, genetic diversity  
345 and structure of the poecilosclerid sponge *Phorbas fictitius* at oceanic islands. *Contrib. Zool.* **79**, 119–129.
- 346 37. Quinteiro J, Rodríguez-Castro J, Rey-Méndez M, González-Henríquez N. 2020 Phylogeography of the insular  
347 populations of common octopus, *Octopus vulgaris* Cuvier, 1797, in the Atlantic Macaronesia. *PLOS ONE* **15**,  
348 e0230294. (doi: 10.1371/journal.pone.0230294).
- 349 38. Domingues VS *et al.* 2008 Tropical fishes in a temperate sea: evolution of the wrasse *Thalassoma pavo* and  
350 the parrotfish *Sparisoma cretense* in the Mediterranean and the adjacent Macaronesian and Cape Verde  
351 Archipelagos. *Mar. Biol.* **154**, 465–474. (doi: 10.1007/s00227-008-0941-z).
- 352 39. Beermann J *et al.* 2020 Ancient globetrotters—connectivity and putative native ranges of two cosmopolitan  
353 biofouling amphipods. *PeerJ*. **8**, e9613. (doi: 10.7717/peerj.9613).
- 354 40. Thiel M, Gutow L. 2005 The ecology of rafting in the marine environment. II. The rafting organisms and  
355 community. **43**, 279–418.
- 356 41. Waters JM, Fraser CI, Hewitt GM. 2013 Founder takes all: density-dependent processes structure biodiversity.  
357 *Trends Ecol. Evol.* **28**, 78–85. (doi: 10.1016/j.tree.2012.08.024).
- 358 42. Torre G, Fernández-Lugo S, Guarino R, Fernández-Palacios JM. 2019 Network analysis by simulated  
359 annealing of taxa and islands of Macaronesia (North Atlantic Ocean). *Ecography* **42**, 768–779. (doi:  
360 0.1111/ecog.03909).
- 361 43. Hachich NF *et al.* 2015 Island biogeography: patterns of marine shallow-water organisms in the Atlantic Ocean.  
362 *J. Biogeogr.* **42**, 1871–1882. (doi: 10.1111/jbi.12560).
- 363 44. Norder SJ *et al.* 2019 Beyond the Last Glacial Maximum: Island endemism is best explained by long-lasting  
364 archipelago configurations. *Glob. Ecol. Biogeogr.* **28**, 184–197. (doi: 10.1111/geb.12835).
- 365 45. Jenkins TL, Castilho R, Stevens JR. 2018 Meta-analysis of northeast Atlantic marine taxa shows contrasting  
366 phylogeographic patterns following post-LGM expansions. *PeerJ* **6**, e5684. (doi: 10.7717/peerj.5684).
- 367 46. Santos RS, Hawkins S, Monteiro LR, Alves M, Isidro EJ. 1995 Marine research, resources and conservation in  
368 the Azores. *Aquat. Conserv. Mar. Freshw. Ecosyst.* **5**, 311–354.
- 369 47. Arístegui J *et al.* 2009 Sub-regional ecosystem variability in the Canary Current upwelling. *Prog. Oceanogr.* **83**,  
370 33–48. (doi: 10.1016/j.pocean.2009.07.031).
- 371 48. Hawkins SJ, Corte-Real HBSM, Pannacciulli FG, Weber LC, Bishop JDD. 2000 Thoughts on the ecology and  
372 evolution of the intertidal biota of the Azores and other Atlantic islands. *Hydrobiologia* **440**, 3–17. (doi:  
373 10.1023/A:1004118220083).
- 374 49. Xavier R, Branco M, dos Santos AM. 2016 Using a phylogeographic approach to investigate the diversity and  
375 determine the distributional range of an isopod (Crustacea: Peracarida), *Stenosoma nadejda* (Rezig, 1989) in  
376 the Atlantic-Mediterranean region. *Hydrobiologia* **768**, 315–328. (doi: 10.1007/s10750-015-2559-8).
- 377 50. Cabezas MP, Cabezas P, Machordom A, Guerra-García JM. 2013 Hidden diversity and cryptic speciation refute  
378 cosmopolitan distribution in *Caprella penantis* (Crustacea: Amphipoda: Caprellidae). *J. Zool. Syst. Evol. Res.*  
379 **51**, 85–99. (doi: 10.1111/jzs.12010).
- 380 51. Fernández-Palacios JM *et al.* 2011 A reconstruction of Palaeo-Macaronesia, with particular reference to the  
381 long-term biogeography of the Atlantic Island laurel forests. *J. Biogeogr.* **38**, 226–246. (doi: 10.1111/j.1365-  
382 2699.2010.02427.x).
- 383 52. Radulovici AE, Archambault P, Dufresne F. 2010 DNA Barcodes for Marine Biodiversity: Moving Fast  
384 Forward? *Diversity* **2**, 450–472. (doi: 10.3390/d2040450).
- 385 53. Hey J. 2006 On the failure of modern species concepts. *Trends Ecol. Evol.* **21**, 447–450.

- 386 54. Coyne JA, Orr HA. 2004 *Speciation*. Oxford University Press.
- 387 55. Casacci LP, Barbero F, Balletto E. 2014 The “Evolutionarily Significant Unit” concept and its applicability in  
388 biological conservation. *Ital. J. Zool.* **81**, 182–193. (doi: 10.1080/11250003.2013.870240).
- 389 56. Pante E *et al.* 2015 Species are hypotheses: avoid connectivity assessments based on pillars of sand. *Mol. Ecol.*  
390 **24**, 525–544. (doi: 10.1111/mec.13048).
- 391 57. Allendorf F, Luikart G, Aitken S. 2012 *Conservation and the Genetics of Populations*. Wiley.
- 392 58. Frankham R. 1998 Inbreeding and Extinction: Island Populations. *Conserv. Biol.* **12**, 665–675.
- 393 59. Korpinen S *et al.* 2021 Combined effects of human pressures on Europe’s marine ecosystems. *Ambio.*  
394 (doi:10.1007/s13280-020-01482-x).
- 395 60. Cacabelos E *et al.* 2020 Limited effects of marine protected areas on the distribution of invasive species, despite  
396 positive effects on diversity in shallow-water marine communities. *Biol. Invasions* **22**, 1169–1179. (doi:  
397 10.1007/s10530-019-02171-x).
- 398 61. Rogers AD *et al.* 2020 Critical Habitats and Biodiversity: Inventory, Thresholds and Governance.  
399 [www.oceanpanel.org/blue-papers/critical-habitats-and-biodiversity-inventory-thresholds-and-governance](http://www.oceanpanel.org/blue-papers/critical-habitats-and-biodiversity-inventory-thresholds-and-governance).
- 400 62. Quinteiro J *et al.* 2012 Rede BANGEMAC: Banco genético marinho de Macaronésia (Memória técnica).
- 401 63. Vieira *et al.* 2021. Gaps in DNA sequence libraries for Macaronesian marine macroinvertebrates imply decades  
402 till completion and robust monitoring. *Divers. Distrib.* Accepted.
- 403 64. Hupał K *et al.* 2019 Persistence of phylogeographic footprints helps to understand cryptic diversity detected  
404 in two marine amphipods widespread in the Mediterranean basin. *Mol. Phylogenet. Evol.* **132**, 53–66. (doi:  
405 10.1016/j.ympev.2018.11.013).
- 406 65. Cheng J, Karambelkar B, Xie Y. 2018 leaflet: Create Interactive Web Maps with the JavaScript ‘Leaflet’  
407 Library. R package version 2.0.1. <https://CRAN.R-project.org/package=leaflet>.

408 **Table 1.** Presence (●) of the peracaridean species used in this study in each region.  
 409 Mean and Maximum (Max) intraspecific distance (ISD) for each species. The Mean p-distance between the  
 410 Iberian Peninsula (IP) and Webbnesia (MACA) populations for each morphospecies is also displayed.  
 411 AZ – Azores; MORO – Morocco.  
 412

| Order      | Species                          | MACA | IP | AZ | MORO | Mean ISD | Max ISD | Mean p-distances between IP and MACA |
|------------|----------------------------------|------|----|----|------|----------|---------|--------------------------------------|
| Amphipoda  | <i>Ampithoe helleri</i>          | ●    | ●  |    |      | 0.0715   | 0.1327  | 0.1230                               |
|            | <i>Ampithoe ramondi</i>          | ●    | ●  | ●  |      | 0.0181   | 0.0385  | 0.0341                               |
|            | <i>Ampithoe riedli</i>           | ●    | ●  |    | ●    | 0.0439   | 0.0827  | 0.0782                               |
|            | <i>Apohyale perieri</i>          | ●    | ●  | ●  |      | 0.0483   | 0.1135  | 0.0770                               |
|            | <i>Apohyale stebbingi</i>        | ●    | ●  | ●  | ●    | 0.1243   | 0.2000  | 0.1574                               |
|            | <i>Caprella acanthifera</i>      | ●    | ●  | ●  | ●    | 0.0805   | 0.1462  | 0.1374                               |
|            | <i>Elasmopus pecteniscrus</i>    | ●    | ●  |    | ●    | 0.0381   | 0.0635  | 0.0583                               |
|            | <i>Jassa herdmanni</i>           | ●    | ●  | ●  |      | 0.0751   | 0.1362  | 0.1237                               |
|            | <i>Podocerus variegatus</i>      | ●    | ●  |    |      | 0.0613   | 0.1019  | 0.0974                               |
|            | <i>Protohyale schmidtii</i>      | ●    | ●  | ●  | ●    | 0.0693   | 0.1346  | 0.1087                               |
|            | <i>Quadrimaera inaequipes</i>    | ●    | ●  |    |      | 0.0911   | 0.1596  | 0.1357                               |
|            | <i>Serejohyale spinidactylus</i> | ●    | ●  | ●  |      | 0.1152   | 0.1769  | 0.1348                               |
|            | <i>Stenothoe monoculoides*</i>   | ●    | ●  |    |      | 0.1637   | 0.2765  | 0.2765                               |
| Isopoda    | <i>Anthura gracilis</i>          | ●    | ●  | ●  | ●    | 0.1521   | 0.2846  | 0.2800                               |
|            | <i>Campecopea lusitanica</i>     | ●    | ●  |    |      | 0.1012   | 0.1981  | 0.1226                               |
|            | <i>Cymodoce truncata</i>         | ●    | ●  | ●  |      | 0.1263   | 0.2019  | 0.1619                               |
|            | <i>Dynamene edwardsi</i>         | ●    | ●  | ●  | ●    | 0.1140   | 0.1865  | 0.1643                               |
|            | <i>Gnathia maxillaris</i>        | ●    | ●  |    |      | 0.1324   | 0.2038  | 0.2000                               |
|            | <i>Janira maculosa</i>           | ●    | ●  |    |      | 0.1715   | 0.2673  | 0.2564                               |
|            | <i>Joeropsis brevicornis</i>     | ●    | ●  |    |      | 0.1252   | 0.2500  | 0.2462                               |
| Tanaidacea | <i>Apseudopsis latreilii</i>     | ●    | ●  |    |      | 0.1674   | 0.2404  | 0.2372                               |
|            | <i>Tanais dulongii</i>           | ●    | ●  |    | ●    | 0.0840   | 0.1192  | 0.1150                               |
|            | <i>Tanais grimaldii</i>          | ●    | ●  | ●  |      | 0.0919   | 0.1481  | 0.1065                               |

413  
 414 \**Stenothoe monoculoides* was retrieved from North Sea instead of IP.  
 415

416 **Table 2.** Number of MOTUs accordingly to different molecular species delineation methods for each  
 417 morphospecies.  
 418

| Order                         | Species                          | ABGD K2P | BOLD | TCS 95% | bPTP | GMYC | Consensus |
|-------------------------------|----------------------------------|----------|------|---------|------|------|-----------|
| <b>Amphipoda</b>              | <i>Ampithoe helleri</i>          | 3        | 3    | 3       | 3    | 3    | 3         |
|                               | <i>Ampithoe ramondi</i>          | 1        | 2    | 2       | 2    | 2    | 2         |
|                               | <i>Ampithoe riedli</i>           | 2        | 2    | 3       | 2    | 2    | 2         |
|                               | <i>Apohyale perieri</i>          | 4        | 4    | 4       | 4    | 4    | 4         |
|                               | <i>Apohyale stebbingi</i>        | 9        | 13   | 11      | 11   | 11   | 11        |
|                               | <i>Caprella acanthifera</i>      | 3        | 4    | 4       | 4    | 4    | 4         |
|                               | <i>Elasmopus pecteniscrus</i>    | 2        | 3    | 4       | 3    | 4    | 3         |
|                               | <i>Jassa herdmani</i>            | 2        | 2    | 3       | 3    | 3    | 3         |
|                               | <i>Podocerus variegatus</i>      | 3        | 3    | 3       | 3    | 3    | 3         |
|                               | <i>Protohyale schmidtii</i>      | 2        | 5    | 6       | 2    | 6    | 2         |
|                               | <i>Quadrimaera inaequipus</i>    | 3        | 3    | 3       | 3    | 3    | 3         |
|                               | <i>Serejohyale spinidactylus</i> | 5        | 5    | 5       | 5    | 5    | 5         |
| <i>Stenothoe monoculoides</i> | 2                                | 2        | 2    | 2       | 2    | 2    |           |
| <b>Isopoda</b>                | <i>Anthura gracilis</i>          | 4        | 5    | 5       | 5    | 5    | 5         |
|                               | <i>Campeopea lusitanica</i>      | 2        | 3    | 2       | 3    | 2    | 2         |
|                               | <i>Cymodoce truncata</i>         | 4        | 4    | 4       | 4    | 4    | 4         |
|                               | <i>Dynamene edwardsi</i>         | 7        | 9    | 9       | 9    | 9    | 9         |
|                               | <i>Gnathia maxillaris</i>        | 3        | 3    | 3       | 3    | 3    | 3         |
|                               | <i>Janira maculosa</i>           | 3        | 3    | 3       | 3    | 3    | 3         |
|                               | <i>Joeropsis brevicornis</i>     | 2        | 2    | 2       | 2    | 2    | 2         |
| <b>Tanaidacea</b>             | <i>Apseudopsis latreilli</i>     | 3        | 3    | 3       | 3    | 3    | 3         |
|                               | <i>Tanais dulongii</i>           | 6        | 6    | 6       | 4    | 6    | 6         |
|                               | <i>Tanais grimaldii</i>          | 4        | 5    | 5       | 4    | 5    | 5         |
|                               | <b>Total</b>                     | 79       | 94   | 95      | 87   | 94   | 89        |

419

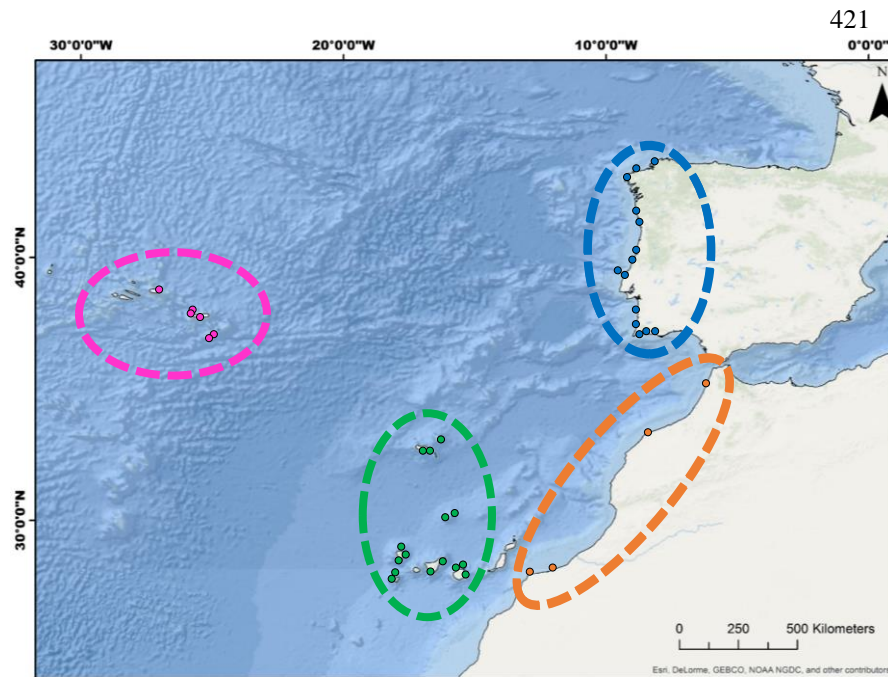

424

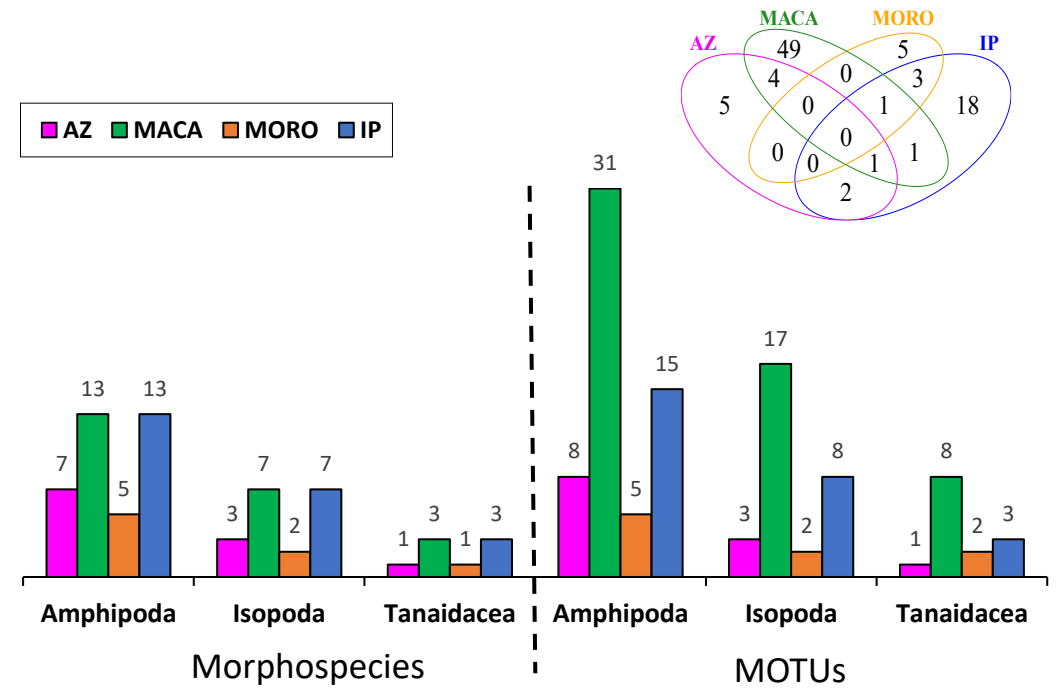

425 **Figure 1.** Sampling locations (left) and number of morphospecies and MOTUs retrieved for each region for each order (right). The Venn diagram shows the total number of  
 426 endemic and shared MOTUs between regions.  
 427 Number of consensus MOTUs accordingly with Table 2. Co-ordinates can be consulted in Table S1. For interactive map, see <http://rpubs.com/Vieira/PeracaridaNE>. In the  
 428 interactive map, in the right-top corner, it is possible to choose the different species and verify the sampling locations for each species. The records of *Stenothoe monoculoides*  
 429 from North Sea are only displayed in the interactive map. The interactive map was created with the package “leaflet” [65], through the software R 3.5.0 [21].  
 430 Az - Azores; MACA - Webbnesia; MORO - Morocco; IP - Iberian Peninsula.

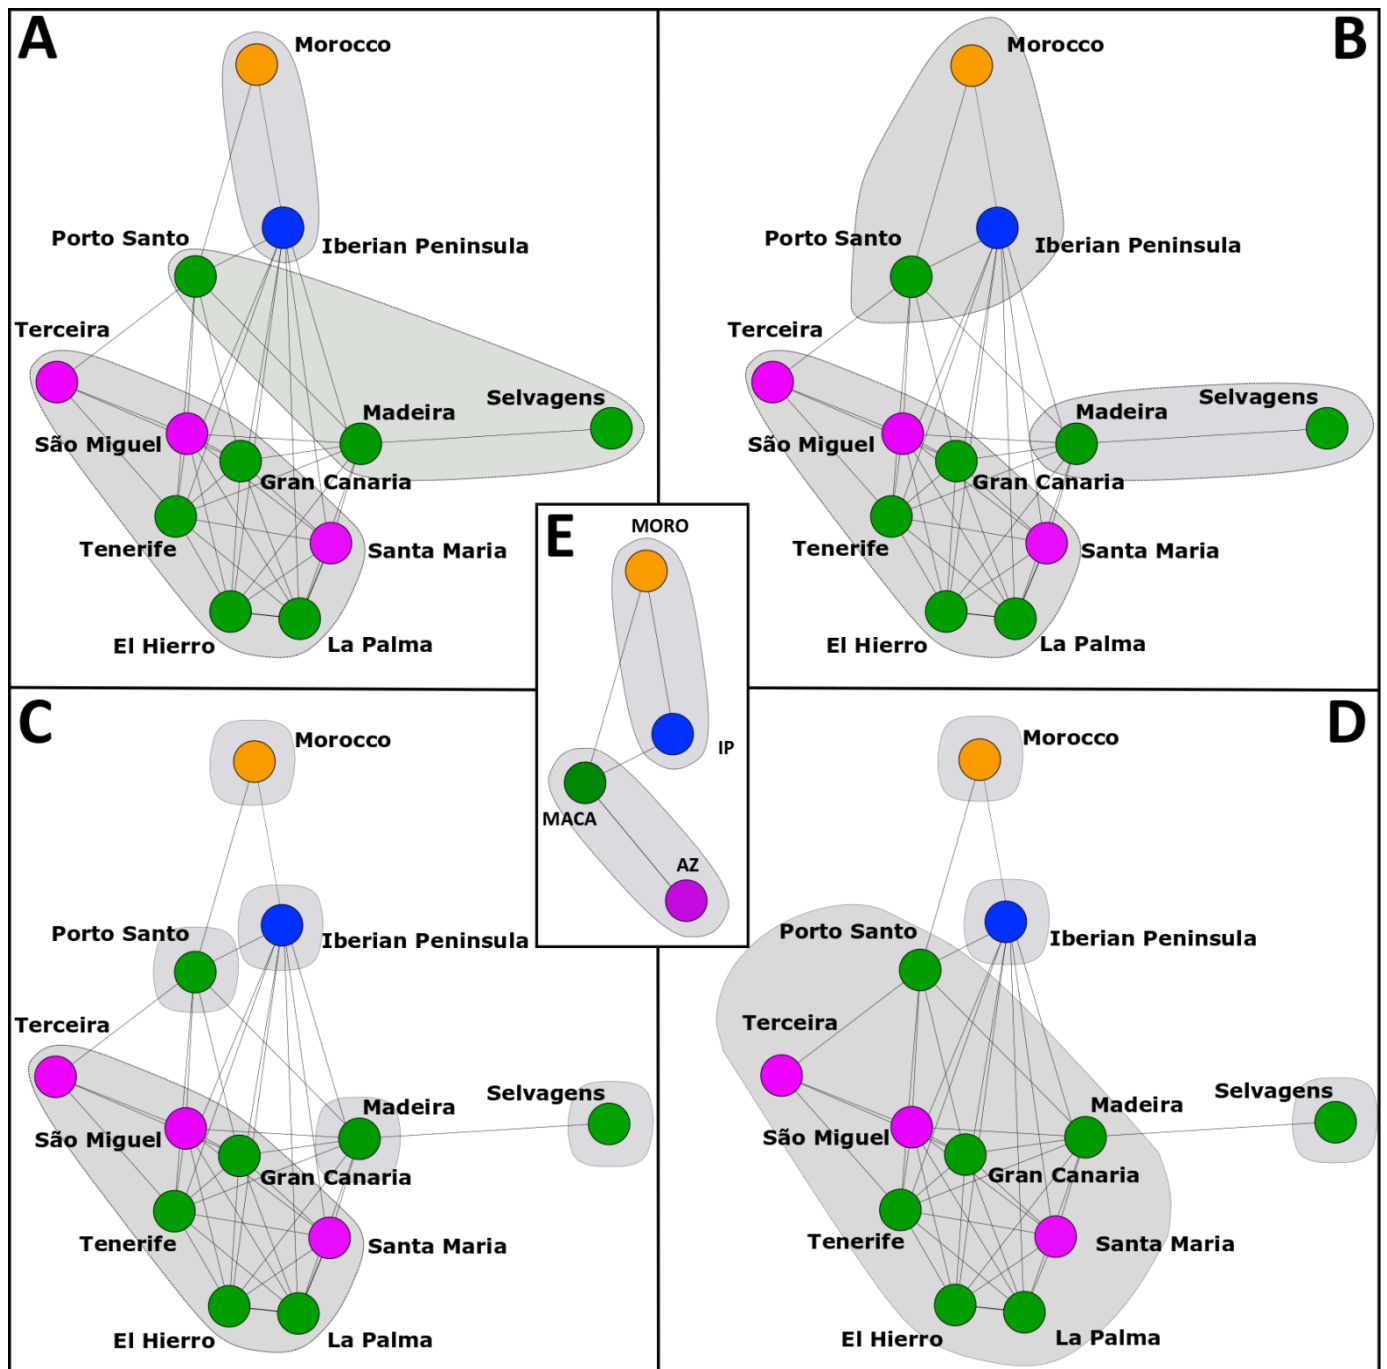

431

432 **Figure 2.** Network scenarios resulted from the best algorithms tested using locations (A-D) and regions (E).

433 A: multi level; B: spinglass; C: edge betweenness; D: walktrap; E: multi level and spinglass.

434 Interactive networks can be accessed at <https://rpubs.com/Vieira/Peracaridab> and at

435 <https://rpubs.com/Vieira/Peracaridab>.

436 Az- Azores; MACA - Webnesia; MORO - Morocco; IP - Iberian Peninsula.
